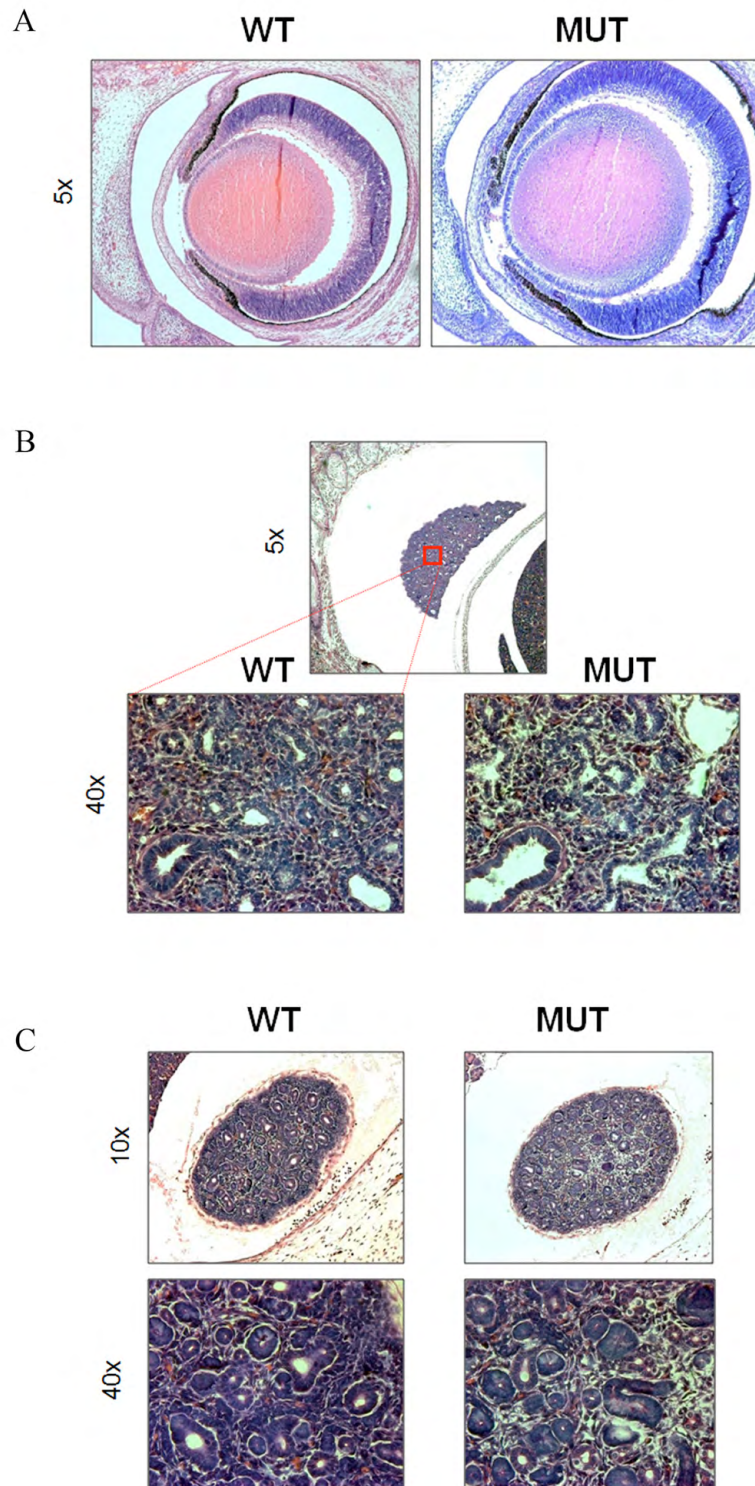

**Fig. S1. The Pygo2-A342E mutation does not cause any obvious defect in mouse developing organs.** Paraffin-embedded sections of the eye (A), lungs (B) and kidneys (C) from 15.5 days post-coitum embryos, were stained with Hematoxylin and Eosin. The magnification level is indicated on the left of the panels. WT, wild type.

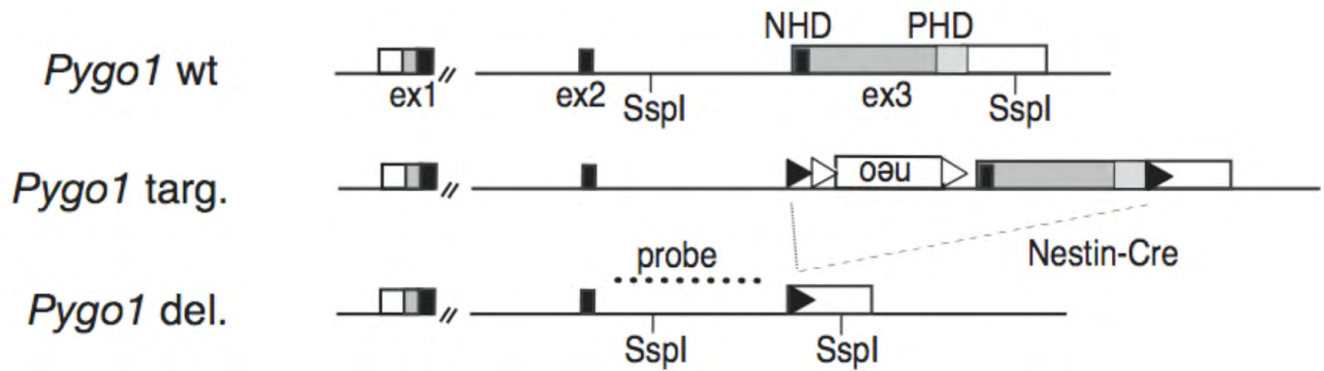

**Fig. S2. Generation of the *Pygo1* knockout allele.** The endogenous *Pygo1* gene has been replaced by a *LoxP*-containing *Pygo1* variant cloned in the targeting vector. *LoxP* sites are located on the opposite ends of the PHD finger coding sequence. After crossing with a CMV-Cre mouse line, the recombination leads to the production of a PHD-deleted protein. The recombination was confirmed with PCR using specific primers (not shown). wt, wild type.

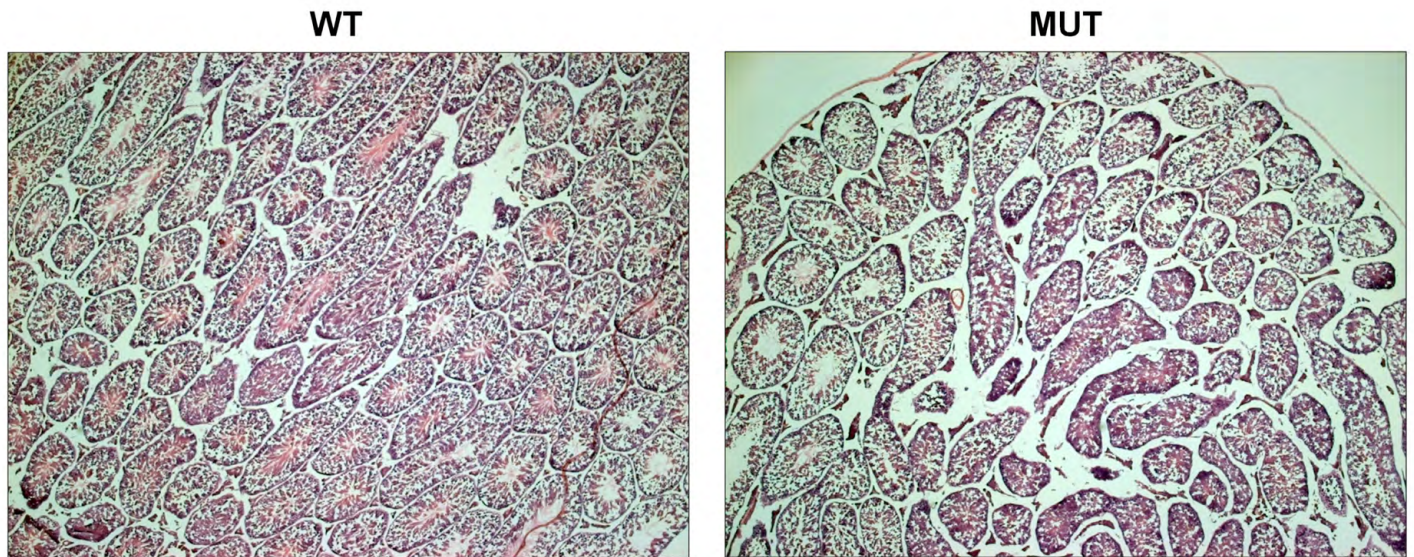

**Fig. S3. Strong decrease of terminally differentiated sperm cells in the seminiferous tubules of MUT mice testes.** Most of the seminiferous tubules in the MUT testis display a severe loss of terminally differentiated sperm cells normally present within the lumen (wild type on the left), as visualized by Hematoxylin and Eosin staining on 10  $\mu$ m testis sections. WT, wild type.

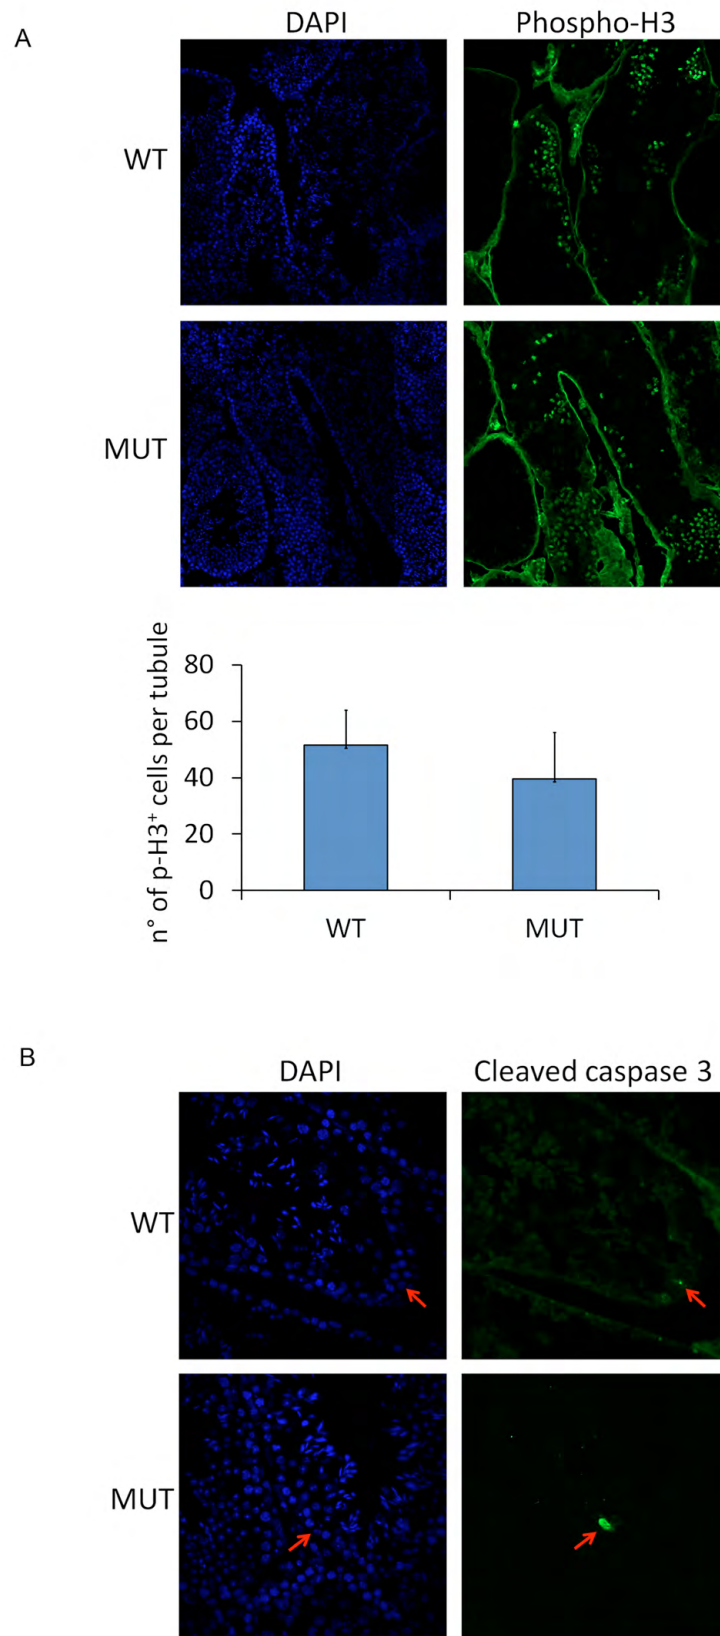

**Fig. S4. Proliferation and apoptosis are not affected in the MUT testicles.** (A) No quantitative difference in the proliferation of spermatocytes in the MUT testis, when compared to a control situation, was detected: the number of cells positive for phosphohistone H3, which marks mitotic cells, displays no statistically significant difference. (B) Very weak and rare signals positive for cleaved caspase 3, a marker for apoptosis, are detected, in our hands, in wild-type seminiferous tubules. No measurable increase is present in the MUT testis. DAPI counterstains cell nuclei (blue signal, A,B). WT, wild type.

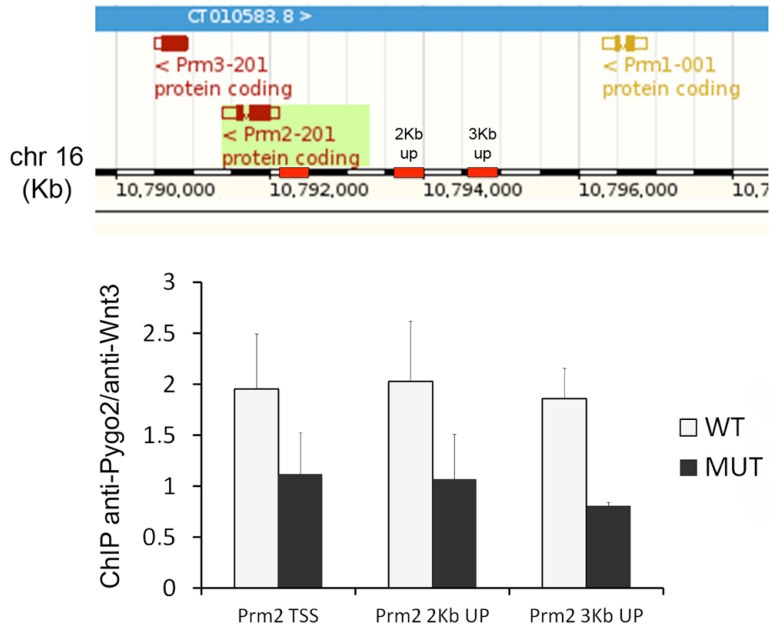

**Fig. S5. Pygo2 binding to chromatin is detected within the intergenic region between *Prm1* and *Prm2* genes.** (Top) Schematic representation of the locus from Ensembl genome browser ([http://www.ensembl.org/Mus\\_musculus/Info/Index](http://www.ensembl.org/Mus_musculus/Info/Index)). The position of the amplified regions is indicated with red boxes. Note that the transcription of the *Prm2* gene proceeds from the right to the left. (Bottom) ChIP followed by quantitative PCR. Data are represented as the fold enrichment (compared to the input samples) obtained using the anti-Pygo2, over the enrichment measured when using the anti-Wnt3 antibody.
